# Supplementary material for: Forcing-dependent submesoscale variability and subduction in a coastal sea area (Gulf of Finland, Baltic Sea)
Source: Copernicus journal article supplement (doi:10.5194/os-21-2555-2025), 2025-10-22
Supplement: Supplementary file [file os-21-2555-2025-supplement-title-page.pdf › os-21-2555-2025-supplement-title-page.pdf]

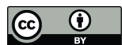

## *Supplement of*

# **Forcing-dependent submesoscale variability and subduction in a coastal sea area (Gulf of Finland, Baltic Sea)**

**Kai Salm et al.**

*Correspondence to:* Kai Salm ([kai.salm@taltech.ee](mailto:kai.salm@taltech.ee))

- [os-21-2555-2025-supplement-title-page.pdf](#)
- [Figure S1.png](#)
- [Figure S2.png](#)
- [Figure S3.png](#)
- [Figure S4.png](#)
- [Figure S5.png](#)
- [Figure S6.png](#)
- [Figure S7.png](#)
- [Figure S8.png](#)
- [Figure S9.png](#)

The copyright of individual parts of the supplement might differ from the article licence.
